**Depression  
treatment  
going  
nowhere?**

**Turn to NeuroStar®.**

**NeuroStar Transcranial Magnetic  
Stimulation Therapy® is the only  
FDA-cleared, non-drug, non-invasive  
treatment for depression.**

NeuroStar TMS Therapy® is indicated for the treatment of Major Depressive Disorder (MDD) in adult patients who have failed to achieve satisfactory improvement from one prior antidepressant medication at or above the minimal effective dose and duration in the current episode.

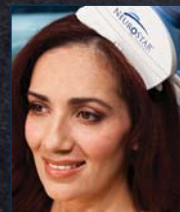

  
**NEUROSTAR®**  
TMS THERAPY

**A proven treatment for depression.**

For a free information pack on how NeuroStar® TMS may work for you and your patients contact us at 877-600-7555 or visit us on the web at [www.neurostartms.com](http://www.neurostartms.com)

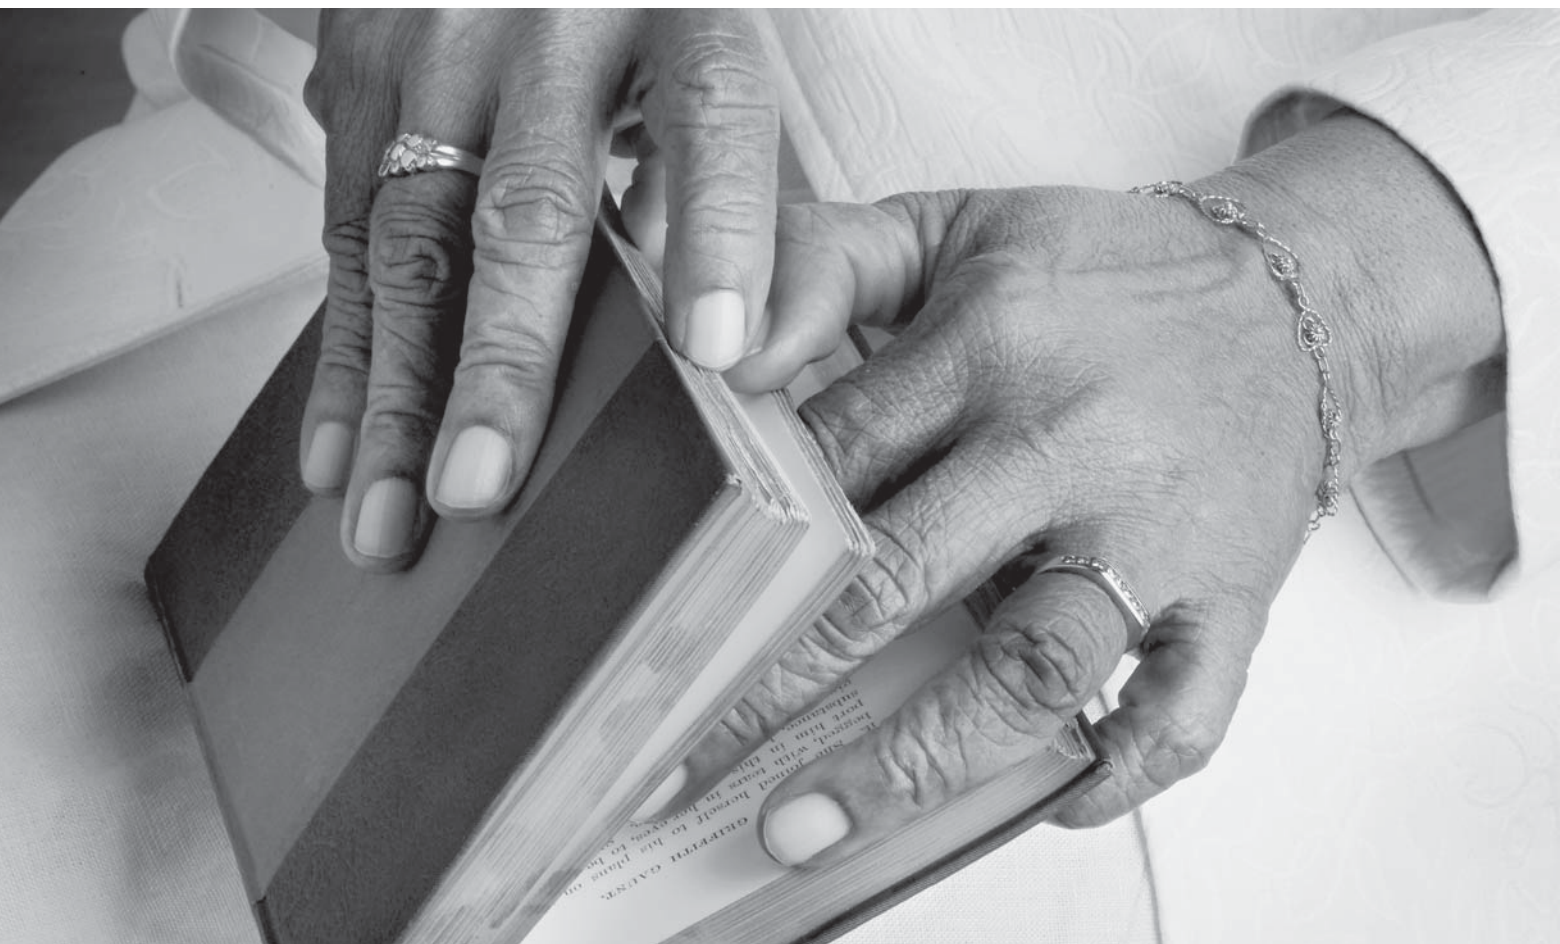

## Complex puzzles. Comprehensive solutions.

At Western Psychiatric Institute and Clinic of UPMC, we take on complex disorders that some other centers won't even attempt to treat.

But whether a patient has a difficult-to-treat disorder or one more easily treated, teams of specialists in psychiatry, psychopharmacology, clinical psychology, and medicine craft complete, individualized treatment plans that draw upon the latest clinical research, much of it conducted by our own investigators. Whether we're interpreting our clinical trial data or a patient's lab results, our work to advance the understanding and treatment of bipolar disorder,

eating disorders, autism, and geriatric behavioral health issues is world-class. In fact, we have one of the world's most comprehensive programs for mood disorders, with research-based treatments for patients at every level of need, at every stage of life.

With more than 400 inpatient psychiatric beds and 75 ambulatory programs, we care for people when they're feeling their worst *and* support them when they're at their best, back with their families in their home towns. Each year, Western Psychiatric helps some 30,000 people of all ages — at all stages of recovery, from all over the world — live healthier and more productive lives.

# UPMC

UPMC.com | 1-800-533-UPMC

Affiliated with the **University of Pittsburgh School of Medicine**,  
UPMC is ranked among the nation's best hospitals by *U.S. News & World Report*.

Grete Lundbeck European Brain Research Foundation Call for Nominations for

# THE BRAIN PRIZE

THE PRIZE OF €1 MILLION WILL BE AWARDED FOR THE FIRST TIME IN COPENHAGEN IN MAY 2011

Nominations by 15 September 2010

Nominations will be reviewed by the Selection Committee:

YVES AGID, FRANCE, HUDA AKIL, USA, COLIN BLAKEMORE, UNITED KINGDOM, CHAIRMAN  
FRED. H. GAGE, USA, TOMAS HÖKFELT, SWEDEN, VICE-CHAIRMAN, FLORIAN HOLSBOER, GERMANY  
RANGA R. KRISHNAN, SINGAPORE, JES OLESEN, DENMARK

FOR THE NOMINATION FORM AND DETAILS OF THE NOMINATION PROCEDURE, PLEASE VISIT: [WWW.THEBRAINPRIZE.ORG](http://WWW.THEBRAINPRIZE.ORG)

GRETE LUNDBECK  
EUROPEAN  
BRAIN RESEARCH  
FOUNDATION

THE  
BRAIN  
PRIZE

*The Brain Prize recognizes and rewards outstanding contributions to European neuroscience, from basic to clinical*

## HUMAN RIGHTS AWARD

### ↳ PURPOSE ↳

The Human Rights Award was established to recognize an individual and an organization whose efforts exemplify the capacity of human beings to act courageously and effectively to prevent human rights violations, to protect others from human rights violations and their psychiatric consequences, and to help victims recover from human rights abuses.

### ↳ NOMINATION PROCEDURES ↳

APA members are asked to submit nominations by July 1, 2010 to:

Council on Psychiatry and Law  
American Psychiatric Association  
c/o Yoshie Davison, Staff Liaison  
1000 Wilson Blvd., Suite 1825  
Arlington, VA 22209  
E-mail: [advocacy@psych.org](mailto:advocacy@psych.org)

The nomination letter should succinctly describe the contributions that are the basis for the nomination and be accompanied by a curriculum vitae of the nominee. The Council on Psychiatry and Law will serve as the award review panel in determining the recipients of this award. The recipients will receive a plaque which will be awarded during the Convocation at the APA's Annual Meeting in May 2011.

## Volunteer for DSM-5 Field Trials

American Psychiatric Institute for Research and Education  
Practice Research Network is recruiting

### *Practicing Psychiatrists*

As the 2013 date for publication of the fifth edition of *Diagnostic and Statistical Manual of Mental Disorders* (DSM-5) draws near, the research and clinical experts working on DSM-5 will be finalizing the diagnostic criteria and testing potential revisions and assessment tools in field trials across a number of clinical settings.

The DSM-5 Field Trials involving practicing psychiatrists will focus primarily on 1) the feasibility and clinical utility of the proposed modifications to the diagnostic criteria for a broad range of disorders in the full range of clinical settings, and 2) the feasibility and clinical utility of cross-cutting and diagnostic-specific dimensional measures that are incorporated into the diagnostic scheme for DSM-5.

Practicing psychiatrists interested in volunteering for potential participation in DSM-5 field trials should send an email to [aparesearch@psych.org](mailto:aparesearch@psych.org) with the following information:

- Full name
- Institution or organizational affiliation
- Mailing address
- Job title
- Preferred e-mail
- Area of expertise (e.g., child psychiatry, geriatric psychiatry, etc.)

This information will help determine your eligibility to participate in the DSM-5 field trials.

**For information about revisions to the DSM  
please visit [www.DSM5.org](http://www.DSM5.org)**

*The American Psychiatric Institute for Research and Education is a 501 (c) (3) subsidiary of the American Psychiatric Association.*

# The NEW [www.appi.org](http://www.appi.org) makes its debut! *Visit today*

## The new [www.appi.org](http://www.appi.org) offers:

- Special Discounts for American Psychiatric Association Members and Members-in-Training
- Detailed descriptions on more than 700 titles plus subscription products
- **My Account** history with order and tracking information
- Fast and easy navigation
- Enhanced search engine

The screenshot shows the homepage of the American Psychiatric Publishing website. At the top, there is a navigation menu with links for 'Disorders', 'Subjects', 'Assessment & Treatment', 'Guides, References & Manuals', 'Books', 'Journals', and 'eContent'. A search bar is prominently displayed. The main content area is divided into several sections: 'Featured Titles' featuring 'Long-Term Psychodynamic Psychotherapy' by Glen O. Gabbard, M.D., with a 'Paperback • \$65.00' price tag and an 'Add to Cart' button; 'Featured Author' for Glen O. Gabbard, M.D., with a 'Learn More' link; 'Discover the Journals of American Psychiatric Publishing' featuring 'PSYCHIATRIC SERVICES', 'THE AMERICAN JOURNAL OF PSYCHIATRY', and 'FOCUS'; and 'Explore the DSM Library' for the 'DIAGNOSTIC AND STATISTICAL MANUAL OF MENTAL DISORDERS, FOURTH EDITION, TEXT REVISION, DSM-IV-TR'. On the right side, there are sections for 'Resources' (listing various user groups like APA Members, Educators, etc.), 'Search Books' (powered by Google), and 'Subscribe' to the APPI Newsletter. The footer contains copyright information and contact details for American Psychiatric Publishing, Inc.

**Special Discount for Members:**  
**15% Discount** for APA Members  
**30% Discount** for APA Members-in-Training

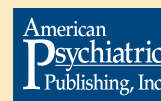

The *First* and *Last* Word in Psychiatry

American Psychiatric Publishing, Inc.  
[appi@psych.org](mailto:appi@psych.org) • 1-800-368-5777 • 703-907-7322

# Essential NEW TITLES in PSYCHIATRY

## Handbook of Diagnosis and Treatment of Bipolar Disorders

Edited by Terence A. Ketter, M.D.

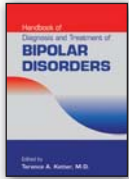

This book will help physicians keep abreast of dramatic and rapid advances of recent years and integrate them into their practice.

2010 • 768 pages • ISBN 978-1-58562-313-6  
Paperback • \$72.00 • Item #62313

## Successful Cognitive and Emotional Aging

Edited by Colin A. Depp, Ph.D., and Dilip V. Jeste, M.D.

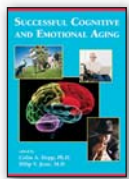

The foremost experts in aging research in a monograph designed to provide the

state of the science of healthy brain aging in practical terms.

2010 • 441 pages • ISBN 978-1-58562-351-8  
Paperback • \$45.00 • Item #62351

## The Evidence-Based Guide to Antipsychotic Medications

Edited by Anthony J. Rothschild, M.D.

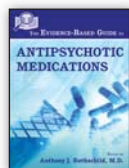

A comprehensive overview of our current knowledge regarding the use of antipsychotic

medications to treat a broad range of psychiatric conditions, from mood and anxiety disorders to schizophrenia.

2010 • 384 pages • ISBN 978-1-58562-366-2  
Paperback • \$59.00 • Item #62366

## Textbook of Pediatric Psychosomatic Medicine

Edited by Richard J. Shaw, M.B., B.S., and David R. DeMaso, M.D.

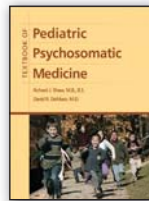

*Textbook of Pediatric Psychosomatic Medicine* is a scholarly, authoritative, evidence-based

review of the field designed to meet the needs of a wide range of professionals, including psychiatrists, pediatricians, psychologists, nurses, medical students, and social workers who work with children in medical settings. Notable are substantive chapters on often-neglected but critical topics, such as pediatric palliative care, Munchausen syndrome by proxy, and pediatric feeding disorders.

2010 • 608 pages • ISBN 978-1-58562-350-1  
Hardcover • \$125.00 • Item #62350

## How to Practice Evidence-Based Psychiatry

Basic Principles and Case Studies

Edited by C. Barr Taylor, M.D.

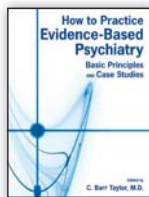

This book explains the methods and philosophy of evidence-based psychiatry and describes

ways in which psychiatrists and other mental health specialists can incorporate evidence-based psychiatry into clinical practice.

2010 • 416 pages • ISBN 978-1-58562-365-5  
Paperback • \$95.00 • Item #62365

## Textbook of Anxiety Disorders, Second Edition

Edited by Dan J. Stein, M.D., Ph.D., Eric Hollander, M.D., and Barbara O. Rothbaum, Ph.D., A.B.P.P.

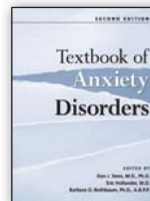

This important new resource offers both clinicians and researchers a single-volume resource that

covers advances in clinical interventions and the latest advances in theoretical knowledge. Following a comprehensive overview of anxiety disorders, the book provides detailed coverage of seven specific DSM-IV-TR diagnoses.

2010 • 822 pages • ISBN 978-1-58562-254-2  
Hardcover • \$125.00 • Item #62254

## Principles and Practice of Child and Adolescent Forensic Mental Health

Edited by Elissa P. Benedek, M.D., Peter Ash, M.D., and Charles L. Scott, M.D.

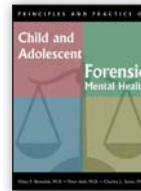

This timely and authoritative sourcebook covers issues ranging from child custody to litigation concerns as it walks clinicians through the legal thickets of depositions and courtroom.

2010 • 544 pages • ISBN 978-1-58562-336-5  
Hardcover • \$125.00 • Item #62336

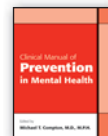

## Clinical Manual of Prevention in Mental Health

Edited by Michael T. Compton, M.D., M.P.H.

A comprehensive guide to applying proven prevention tools in psychiatric units, outpatient clinics, consultation-liaison services, and private office settings.

2010 • 256 pages • ISBN 978-1-58562-347-1 • Paperback • \$55.00 • Item #62347

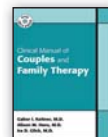

## Clinical Manual of Couples and Family Therapy

Gabor I. Keitner, M.D., Alison Margaret Heru, M.D., and Ira D. Glick, M.D.

Outlines practical, evidence-based family therapy skills, and reestablishes the role of the psychiatrist as the leader of the team of professionals providing mental health care to patients in need.

2010 • 320 pages • ISBN 978-1-58562-290-0 • Paperback • \$65.00 • Item #62290

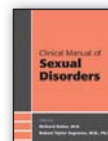

## Clinical Manual of Sexual Disorders

Edited by Richard Balon, M.D., and Robert Taylor Segraves, M.D., Ph.D.

The first comprehensive text in decades to address the management and treatment of sexual dysfunctions.

2009 • 473 pages • ISBN 978-1-58562-338-9 • Paperback • \$55.00 • Item #62338

## ADULT PSYCHIATRY

### Pacific Northwest Medical Director/Clinical

Practice will be combination of 70% Clinical and 30% Administration both outpatient and inpatient.

Join 3 other Psychiatrist, 20 bed unit average census 10-12

EXCEPTIONAL compensation, employee model, sign on bonus, collegial environment Financially sound, very stable non profit Medical Center, opening due to retirement.

Mid size College town offers quality lifestyle, no traffic hassles, a commercial airport, highly rated public and private schools, 2 other State Universities within 25 minute drive. Abundant outdoor recreation, fabulous fishing, boating, white water rafting, 25 mile paved biking/jogging trail along the river.

#### PLEASE CONTACT

Eva Page — Eva Page & Associates, Inc.

evapage@mac.com

425-451-8063 (pacific time)

## Psychiatrist

Amery, Wisconsin

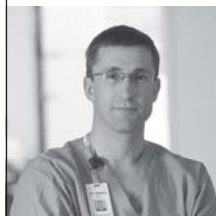

HealthPartners has an exciting opportunity for a practicing psychiatrist to join our group at the Amery Regional Medical Center (ARMC) in Amery, WI.

This key position will provide direct patient care as chief physician for our psychiatric treatment program, coordinate ARMC's psychiatric medical policies and procedures, and implement appropriate integration of clinical and medical services.

Top candidates will be board certified by the American Board of Psychiatry and Neurology or the Osteopathic Board of Neurology and Psychiatry. Geriatrics experience or board eligibility in geropsychiatry is preferred.

Forward CV and cover letter to [lori.m.fake@healthpartners.com](mailto:lori.m.fake@healthpartners.com) or apply online at [www.healthpartners.jobs](http://www.healthpartners.jobs). For more details, call (800) 472-4695 x1. EOE

 **HealthPartners**<sup>®</sup>  
Medical Group

[www.healthpartners.com](http://www.healthpartners.com)

## SCENIC CALIFORNIA CENTRAL COAST

### ATASCADERO STATE HOSPITAL BE/BC Psychiatrist

Atascadero State Hospital now pays board certified psychiatrists starting at \$223,464 and advancing stepwise to \$255,732. Atascadero is the nation's premier center for the treatment of forensically committed mentally ill patients. Our hospital is a teaching site affiliated with the University of California, accredited by JCAHO, and recipient of the prestigious Codman Award. All of our psychiatrists are board eligible and most are board certified. Many of our psychiatrists have forensic subspecialty boards.

We are located midway between San Francisco and Los Angeles on the scenic central California Coast, south of Big Sur. We offer a spectacularly beautiful environment in San Luis Obispo County with temperate climate, beaches, world class wineries, cultural activities, golfing, sailing, riding, clean air, and excellent schools through the University level.

Our benefit package is valued at an additional 39%, which includes retirement plans (including safety retirement), health plans, professional liability coverage, paid holidays, educational leave, and generous annual leave. On-call duty is compensated hour for hour over and above the base salary. Applicants must hold a current California license, or have pending application with the Medical Board of California.

For a prompt and confidential review, send CV to:

Jeanne Garcia, M.D.

P. O. Box 7001

Atascadero, CA 93423-7001

(805) 468-2005 or fax (805) 468-2138

or e-mail us: [jeanne.garcia@ash.dmh.ca.gov](mailto:jeanne.garcia@ash.dmh.ca.gov)

WE ARE AN EQUAL OPPORTUNITY EMPLOYER.

## ADULT PSYCHIATRY

Logan, Utah

One BC/BE adult psychiatrist is needed to join a partner who is employed by Intermountain Healthcare at Logan Regional Hospital. Position will be 30+ hours per week in an outpatient setting. Physician will also assist in coverage of inpatient services. Salary guarantee with transition to production. Signing bonus available. Full Intermountain benefits including defined pension and match in 401k. Moving allowance provided. EOE. Intermountain is frequently referenced nationally as one of the leaders in delivering high quality/low cost health care.

Logan is a beautiful university community of over 100,000. It is one of the top ten safest communities in which to live. Excellent primary care is available as well as a wide variety of specialty care. Logan fosters a wide variety of cultural, educational, recreational, sporting, commercial and health care opportune-ties. A moderate four seasons and majestic mountains allow for outstanding outdoor recreation opportunities. Along with the academic stimulation of Utah State University, Logan offers superb family living with quality school systems and reasonable living costs generally 10 to 25% less than other areas of the country.

Send/e-mail/fax CV to Intermountain Healthcare, Attn: Wilf Rudert, Physician Recruiting Dept., 36 S. State Street, 21<sup>st</sup> Floor, Salt Lake City, UT 84111. 800-888-3134. Fax: 801-442-2999. [PhysicianRecruit@imail.org](mailto:PhysicianRecruit@imail.org) <http://intermountain.net/docjobs>

## Psychiatrist

The Iowa City Department of Veterans Affairs (VA) Medical Center, Iowa City, Iowa is seeking either a part-time or full-time Psychiatrist for the Compensation and Pension Program. The Examiner will provide competent, critical, objective, and unbiased examinations for veterans requesting examinations through the Veterans Benefits Administration. The Examiner's responsibilities will include comprehensive evaluations of a broad range of veteran mental health conditions including Post Traumatic Stress Disorder (PTSD), Depression, Anxiety and Substance abuse. Examinations are for military service related disabilities and not for treatment.

**Qualifications:** Psychiatrist - Board-certified clinician with a current and unrestricted license to practice psychiatry in a State, Territory, Commonwealth of the United States, or the District of Columbia. Experience in disability examinations and/or PTSD are preferred. Salary commensurate with experience;

Please submit CV to:  
VA Medical Center, Attn: Human Resources/Dawn  
McCalley, 601 Highway 6 West, Iowa City, IA 52246.

*This is not a J-1 opportunity.*

*The Department of Veterans Affairs is an Equal Opportunity/Affirmative  
Action Employer.  
Women and minorities are strongly encouraged to apply.*

## Psychiatrist

### VA Pittsburgh Healthcare System

Vacancy exists at the VA Pittsburgh Healthcare System for a full time Psychiatrist who is board eligible or board certified in Addiction Psychiatry. The incumbent will serve as Section Chief/Medical Director of the Center for the Treatment of Addictive Disorders (CTAD). The CTAD program is composed of a 14 day intensive rehabilitation program and outpatient clinics that include a dual diagnosis clinic and opiod substitution clinic. The incumbent will be responsible for the supervision of general psychiatry residents and addiction psychiatry fellows, provide direct clinical care to veterans with substance abuse problems as well as assist in administrative duties related to program operation.

Send CV by email to Barbara Wittman at  
Barbara.Wittman@va.gov or by fax to 412-360-6905.  
EOE

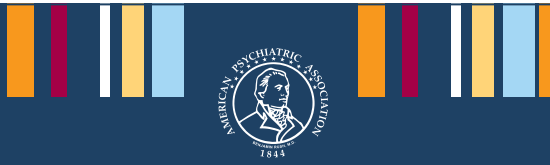

**It only takes a moment...**  
Update your APA member profile on-line today.

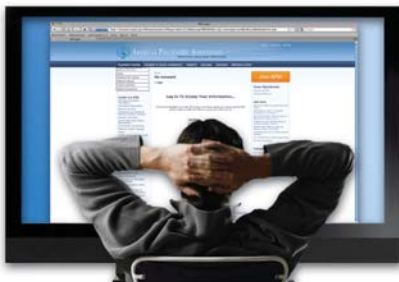

Go to [www.psych.org](http://www.psych.org) and select "Members Corner"

Update your contact, biographical and practice information any time by accessing your member profile record in the APA Member's Corner at [www.psych.org](http://www.psych.org). Periodically checking and updating your membership record will make it easier for other members to get in touch with you (and you with them) — now patient referrals can be dependably made using the most current and up-to-date information possible!

[www.psych.org](http://www.psych.org)

## GREAT OPPORTUNITY

### ADULT OR GERIATRIC PSYCHIATRIST

Asana Integrated Medical Group has several openings for adult or geriatric psychiatrists both in the inpatient as well as outpatient settings including Telepsychiatry.

Competitive compensation and benefits package. We will assist with the relocation process and the relocation expenses for professionals residing out of the area. J1 and H1 sponsorships. Don't miss these outstanding opportunities.

Positions are available in:

- Arkansas
- California
- Missouri
- Montana
- New Mexico
- Tennessee

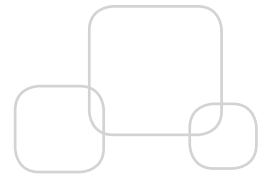

For more information call  
Regina Twentymon (888) 907-1483.  
Email CV: [rtwentymon@asanamg.com](mailto:rtwentymon@asanamg.com)  
Fax: (818) 907-1482.

**GREAT OPPORTUNITY**

## **GERIATRIC PSYCHIATRIST**

**SOUTHERN CALIFORNIA  
LOS ANGELES AREA**

Asana Integrated Medical Group has an opening for a geriatric psychiatrist. Psychiatric duties include inpatient and outpatient care. Compensation: Competitive salary with comprehensive benefits package. We will assist with the relocation process and the relocation expenses for professionals residing out of the area. J1 and H1 sponsorships. Don't miss this outstanding opportunity!

For more information call  
Regina Twentymon (888) 907-1483.  
Email CV: [rtwentymon@asanamg.com](mailto:rtwentymon@asanamg.com)  
Fax: (818) 907-1482.

# Isaac Ray Award

The American Psychiatric Association and the American Academy of Psychiatry and the Law invites nominations for the Isaac Ray Award for 2011. This Award honors Dr. Isaac Ray, one of the original founders and the fourth President of the American Psychiatric Association, and is presented to a person who has made outstanding contributions to forensic psychiatry or to the psychiatric aspects of jurisprudence. The Award, which will be presented at the Convocation of Fellows at the Annual Meeting of the American Psychiatric Association in Honolulu, HI, in May 2011, includes an honorarium of \$1,500. The recipient obligates him or herself to deliver a lecture or series of lectures on these subjects and to present the manuscript for publication.

Nominations are requested as follows:

1. Primary nominating letter (sent with the consent of the candidate), which includes a curriculum vitae and specific details regarding the candidate's qualifications for the Award.
2. Supplemental letter from a second nominator in support of the candidate. Additional letters related to any particular candidate will not be accepted or reviewed by the Award Committee. Nominators should not submit letters on behalf of more than one candidate.

The deadline for receipt of nominations is **July 1, 2010**. Nominations will be kept in the pool of applicants for two years.

Nominations, as outlined above, should be submitted to:

**Renee L. Binder, M.D., Chairperson**  
**c/o Yoshie Davison, Staff Liaison**  
**Isaac Ray Award Committee**  
**American Psychiatric Association**  
**1000 Wilson Boulevard, Suite 1825**  
**Arlington, VA 22209**  
**E-mail: [advocacy@psych.org](mailto:advocacy@psych.org)**

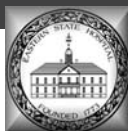

## **VIRGINIA DEPARTMENT OF BEHAVIORAL HEALTH AND DEVELOPMENTAL SERVICES**

### **Eastern State Hospital CAREER OPPORTUNITY**

**Behavioral Health Facility Director (Position #00437)**

The Virginia Department of Behavioral Health and Developmental Services (DBHDS) is seeking an accomplished professional to effectively lead Eastern State Hospital (ESH), a 300 bed Joint Commission accredited inpatient psychiatric facility located in Williamsburg, VA. Our new award winning geriatric and adult mental health center's offer high quality behavioral health and recovery programs to the individuals we serve. Located in the Historic Triangle of Virginia—we are just minutes away from Colonial Williamsburg, Yorktown, and Jamestown. The area is known for its world renowned golf courses, the College of William and Mary and a wide variety of dining, recreational, and shopping opportunities. Within a short driving distance are the Richmond and Washington metro areas, the mountains of the Shenandoah, and numerous beaches on the Chesapeake Bay and Atlantic Ocean. The area enjoys mild climate and provides for a variety of cultural, historic, sports, and recreational venues.

**Purpose of Position:** The major function of this position is to create an environment that enables both staff and the persons served to achieve the best outcomes, and that fosters collaboration among all facility stakeholders including persons served, their families, staff, community based consumers, regional providers, and advocates. As the facility director, the incumbent will consistently provide high quality client care, human resources management including competency-based training, financial management, general administration, planning and interagency activities, and research and evaluation administration. The incumbent will also work efficiently and effectively with appropriate community and governmental agencies, as well as participate in all aspects of regional planning for the delivery of publicly funded behavioral health services.

**Qualifications:** Demonstrated knowledge, skills, and abilities to: lead comprehensive behavioral health programs and services; lead the administrative and business operations of a complex hospital; effectively lead human resources programs, financial programs and strategic and operational planning; direct the work of multi-disciplinary teams of behavioral health/developmental disability clinicians, professionals and administrative staff; provide effective leadership to a network of diverse groups and public/private community based treatment programs and providers; and, effectively communicate with consumers, their families, all levels of facility staff and community based providers.

An advanced degree in human services, business/public/hospital administration is preferred. Progressive leadership experience in the management and administration of a behavioral health organization is required.

We offer a competitive salary and state benefit package, including life, health, disability and malpractice insurance; an excellent deferred compensation and retirement program; and a generous leave package.

To apply, please visit: <https://jobs.agencies.virginia.gov>. We will only accept online applications submitted via this website. You may also submit a cover letter and CV, but these documents will not substitute for a complete online application. This position will remain open until filled. For more information contact: Stacy Pendleton, Human Resources Manager at 804-786-6326 or [stacy.pendleton@dbhds.virginia.gov](mailto:stacy.pendleton@dbhds.virginia.gov).

*ESH is a tobacco-free campus. A fingerprint based criminal history check is required.*

*ESH is an Equal Opportunity Employer Committed to Workforce Diversity*

Virginia Department of Behavioral Health and Developmental Services  
(804) 786-1078  
[www.dbhds.virginia.gov](http://www.dbhds.virginia.gov)



# Index to Advertisers

## June 2010

The publication of an advertisement in this journal does not imply endorsement of the product or service by the American Psychiatric Association.

Employment Opportunities .....A18-A20

Grete Lundbeck European Brain Research Foundation ..... A6

Neuronetics, Inc. ....C2

University of Pittsburgh Medical Center ..... A5

U.S. Pharmaceuticals, Pfizer, Inc.  
Geodon .....A22-C4

### Subscription and Business Information

The American Journal of Psychiatry, ISSN 0002-953X, is published monthly by the American Psychiatric Association, 1000 Wilson Blvd., Suite 1825, Arlington, VA 22209-3901. Subscriptions (per year): individual \$230.00, international \$347.00. For additional subscription options, including single issues and student rates, please contact Customer Service at 1-800-368-5777 or email [appi@psych.org](mailto:appi@psych.org). Institutional subscriptions are tier priced. For institutional site license or pricing information, contact 703-907-8538 or email [institutions@psych.org](mailto:institutions@psych.org).

Business communications, address changes, and subscription questions from APA members should be directed to the Division of Member Services: (888) 35-PSYCH (toll-free). Nonmember subscribers should call the Circulation Department (800) 368-5777. Author inquiries should be directed to the Journal editorial office: (703) 907-7885 or (703) 907-7884; fax (703) 907-1096; e-mail [ajp@psych.org](mailto:ajp@psych.org).

Business Management: Nancy Frey, Director, Publishing Services; Laura G. Abedi, Associate Director, Production; Alison Jones, Advertising Prepress Manager; Robert Pursell, Associate Publisher Advertising, Sales and Marketing.

Pharmaceutical Print Advertising: Frank Cox, Kathleen Harrison, Valentin Torres, Pharmaceutical Media, Inc. 30 East 33rd Street, New York, NY 10016. (212) 685-5010; fax (212) 685-6126; e-mail [vtorres@pminy.com](mailto:vtorres@pminy.com).

Nonpharmaceutical and Online Sales: Brian Skepton, (703) 907-7332; e-mail [bskepton@psych.org](mailto:bskepton@psych.org).

Pages are produced using Adobe InDesign CS4. Printed by RR Donnelley, Mendota, IL., on acid-free paper effective with Volume 164, Number 11, November 2007.

Periodicals postage paid at Arlington, VA, and additional mailing offices. POSTMASTER: Send address changes to The American Journal of Psychiatry, Circulation Department, American Psychiatric Association, 1000 Wilson Blvd., Suite 1825, Arlington, VA 22209-3901.

Indexed in Abstracts for Social Workers, Academic Abstracts, Biological Abstracts, Chemical Abstracts, Chicago Psychoanalytic Literature Index, Cumulative Index to Nursing Literature, Excerpta Medica, Hospital Literature Index, Index Medicus, International Nursing Index, Nutrition Abstracts, Psychological Abstracts, Science Citation Index, Social Science Source, and Social Sciences Index.

The American Psychiatric Association does not hold itself responsible for statements made in its publications by contributors or advertisers. Unless so stated, material in The American Journal of Psychiatry does not reflect the endorsement, official attitude, or position of the American Psychiatric Association or of the Journal's Editorial Board.

Authorization to photocopy items for internal or personal use, or the internal or personal use of specific clients, is granted by the American Psychiatric Association for libraries and other users registered with the Copyright Clearance Center (CCC) Transactional Reporting Service, provided that the base fee of \$15.00 per copy is paid directly to CCC, 222 Rosewood Drive, Danvers, MA 01923; (978) 750-8400 (tel), (978) 646-8600 (fax), [www.copyright.com](http://www.copyright.com) (web site). 0002-953X/05/\$15.00.

This consent does not extend to other kinds of copying, such as copying for general distribution, for advertising or promotional purposes, for creating new collective works, or for resale. Requests for commercial distribution should be directed to (703) 907-7894. APA does not require that permission be obtained for the photocopying of isolated articles for nonprofit classroom or library reserve use; all fees associated with such permission are waived.

Copyright © 2010 American Psychiatric Association.

## GEODON® (ziprasidone HCl) Capsules

## GEODON® (ziprasidone mesylate) injection for intramuscular use

**BRIEF SUMMARY:** See package insert for full prescribing information.

**INCREASED MORTALITY IN ELDERLY PATIENTS WITH DEMENTIA-RELATED PSYCHOSIS—Elderly patients with dementia-related psychosis treated with antipsychotic drugs are at an increased risk of death. Analyses of seventeen placebo-controlled trials (modal duration of 10 weeks), largely in patients taking atypical antipsychotic drugs, revealed a risk of death in drug-treated patients of between 1.6 to 1.7 times the risk of death in placebo-treated patients. Over the course of a typical 10-week controlled trial, the rate of death in drug-treated patients was about 4.5%, compared to a rate of about 2.6% in the placebo group. Although the causes of death were varied, most of the deaths appeared to be either cardiovascular (e.g., heart failure, sudden death) or infectious (e.g., pneumonia) in nature. Observational studies suggest that, similar to atypical antipsychotic drugs, treatment with conventional antipsychotic drugs may increase mortality. The extent to which the findings of increased mortality in observational studies may be attributed to the antipsychotic drug as opposed to some characteristic(s) of the patients is not clear. GEODON (ziprasidone) is not approved for the treatment of patients with Dementia-Related Psychosis (see WARNINGS).**

### INDICATIONS

GEODON is indicated for the treatment of schizophrenia, as monotherapy for the acute treatment of bipolar manic or mixed episodes, and as an adjunct to lithium or valproate for the maintenance treatment of bipolar disorder. GEODON intramuscular is indicated for acute agitation in schizophrenic patients.

### DOSAGE AND ADMINISTRATION

**Schizophrenia** GEODON Capsules should be administered at an initial daily dose of 20 mg twice daily with food. In some patients, daily dosage may subsequently be adjusted on the basis of individual clinical status up to 80 mg twice daily. Dosage adjustments, if indicated, should generally occur at intervals of not less than 2 days, as steady-state is achieved within 1 to 3 days. In order to ensure use of the lowest effective dose, patients should ordinarily be observed for improvement for several weeks before upward dosage adjustment. Efficacy in schizophrenia was demonstrated in a dose range of 20 mg to 100 mg twice daily in short-term, placebo-controlled clinical trials. There were trends toward dose response within the range of 20 mg to 80 mg twice daily, but results were not consistent. An increase to a dose greater than 80 mg twice daily is not generally recommended. The safety of doses above 100 mg twice daily has not been systematically evaluated in clinical trials. **Maintenance Treatment**—While there is no body of evidence available to answer the question of how long a patient treated with ziprasidone should remain on it, a maintenance study in patients who had been symptomatically stable and then randomized to continue ziprasidone or switch to placebo demonstrated a delay in time to relapse for patients receiving GEODON. No additional benefit was demonstrated for doses above 20 mg twice daily. Patients should be periodically reassessed to determine the need for maintenance treatment. **Bipolar I Disorder Acute Treatment of Manic or Mixed Episodes**—Dose Selection: Oral ziprasidone should be administered at an initial daily dose of 40 mg twice daily with food. The dose may then be increased to 60 mg or 80 mg twice daily on the second day of treatment and subsequently adjusted on the basis of tolerance and efficacy within the range 40 mg to 80 mg twice daily. In the flexible-dose clinical trials, the mean daily dose administered was approximately 120 mg. **Maintenance Treatment** (as an adjunct to lithium or valproate)—Continue treatment at the same dose on which the patient was initially stabilized, within the range of 40 mg to 80 mg twice daily with food. Patients should be periodically reassessed to determine the need for maintenance treatment. **Acute Treatment of Agitation in Schizophrenia Intramuscular Dosing**—The recommended dose is 10 mg to 20 mg administered as required up to a maximum dose of 40 mg per day. Doses of 10 mg may be administered every two hours; doses of 20 mg may be administered every four hours up to a maximum of 40 mg/day. Intramuscular administration of ziprasidone for more than three consecutive days has not been studied. If long-term therapy is indicated, oral ziprasidone hydrochloride capsules should replace the intramuscular administration as soon

as possible. Since there is no experience regarding the safety of administering ziprasidone intramuscular to schizophrenic patients already taking oral ziprasidone, the practice of co-administration is not recommended. Ziprasidone intramuscular is intended for intramuscular use only and should not be administered intravenously. Intramuscular Preparation for Administration GEODON for Injection (ziprasidone mesylate) should only be administered by intramuscular injection and should not be administered intravenously. Single-dose vials require reconstitution prior to administration. Add 1.2 mL of Sterile Water for Injection to the vial and shake vigorously until all the drug is dissolved. Each mL of reconstituted solution contains 20 mg ziprasidone. To administer a 10 mg dose, draw up 0.5 mL of the reconstituted solution. To administer a 20 mg dose, draw up 1.0 mL of the reconstituted solution. Any unused portion should be discarded. Since no preservative or bacteriostatic agent is present in this product, aseptic technique must be used in preparation of the final solution. This medicinal product must not be mixed with other medicinal products or solvents other than Sterile Water for Injection. Parenteral drug products should be inspected visually for particulate matter and discoloration prior to administration, whenever solution and container permit. **Dosing in Special Populations Oral:** Dosage adjustments are generally not required on the basis of age, gender, race, or renal or hepatic impairment. GEODON is not approved for use in children or adolescents. **Intramuscular:** Ziprasidone intramuscular has not been systematically evaluated in elderly patients or in patients with hepatic or renal impairment. As the cyclodextrin excipient is cleared by renal filtration, ziprasidone intramuscular should be administered with caution to patients with impaired renal function. Dosing adjustments are not required on the basis of gender or race.

### CONTRAINDICATIONS

**QT Prolongation** Because of ziprasidone's dose-related prolongation of the QT interval and the known association of fatal arrhythmias with QT prolongation by some other drugs, ziprasidone is contraindicated in patients with a known history of QT prolongation (including congenital long QT syndrome), with recent acute myocardial infarction, or with uncompensated heart failure (see **WARNINGS**). Pharmacokinetic/pharmacodynamic studies between ziprasidone and other drugs that prolong the QT interval have not been performed. An additive effect of ziprasidone and other drugs that prolong the QT interval cannot be excluded. Therefore, ziprasidone should not be given with dofetilide, sotalol, quinidine, other Class Ia and III anti-arrhythmics, mesoridazine, thioridazine, chlorpromazine, droperidol, pimozide, sparfloxacin, gatifloxacin, moxifloxacin, halofantrine, mefloquine, pentamidine, arsenic trioxide, levomethadyl acetate, dolasetron mesylate, probucol or tacrolimus. Ziprasidone is also contraindicated with other drugs that have demonstrated QT prolongation as one of their pharmacodynamic effects and have this effect described in the full prescribing information as a contraindication or a boxed or bolded warning [see **WARNINGS**]. Ziprasidone is contraindicated in individuals with a known hypersensitivity to the product.

### WARNINGS

**Increased Mortality in Elderly Patients with Dementia-Related Psychosis: Elderly patients with dementia-related psychosis treated with antipsychotic drugs are at an increased risk of death. GEODON is not approved for the treatment of dementia-related psychosis (see **BOXED WARNING**).**

**QT Prolongation and Risk of Sudden Death** Ziprasidone use should be avoided in combination with other drugs that are known to prolong the QT<sub>c</sub> interval. Additionally, clinicians should be alert to the identification of other drugs that have been consistently observed to prolong the QT<sub>c</sub> interval. Such drugs should not be prescribed with ziprasidone. Ziprasidone should also be avoided in patients with congenital long QT syndrome and in patients with a history of cardiac arrhythmias (see **CONTRAINDICATIONS**).

**QT Prolongation in Clinical Trials** A study directly comparing the QT/QT<sub>c</sub> prolonging effect of oral ziprasidone with several other drugs effective in the treatment of schizophrenia was conducted in patient volunteers. The mean increase in QT<sub>c</sub> from baseline for ziprasidone ranged from approximately 9 to 14 msec greater than for four of the comparator drugs (risperidone, olanzapine, quetiapine, and haloperidol), but was approximately 14 msec less than the prolongation observed for thioridazine. In this study, the effect of ziprasidone on QT<sub>c</sub> length was not augmented by the presence of a metabolic inhibitor (ketoconazole

200 mg twice daily). In placebo-controlled trials, oral ziprasidone increased the QT<sub>c</sub> interval compared to placebo by approximately 10 msec at the highest recommended daily dose of 160 mg. In clinical trials the electrocardiograms of 2/2988 (0.06%) patients who received GEODON and 1/440 (0.23%) patients who received placebo revealed QT<sub>c</sub> intervals exceeding the potentially clinically relevant threshold of 500 msec. In the ziprasidone-treated patients, neither case suggested a role of ziprasidone. **QT Prolongation and Torsade De Pointes** Some drugs that prolong the QT/QT<sub>c</sub> interval have been associated with the occurrence of torsade de pointes and with sudden unexplained death. The relationship of QT prolongation to torsade de pointes is clearest for larger increases (20 msec and greater) but it is possible that smaller QT/QT<sub>c</sub> prolongations may also increase risk, or increase it in susceptible individuals. Although torsade de pointes has not been observed in association with the use of ziprasidone in premarketing studies and experience is too limited to rule out an increased risk, there have been rare post-marketing reports (in the presence of multiple confounding factors) (see **ADVERSE REACTIONS**). A study evaluating the QT/QT<sub>c</sub> prolonging effect of intramuscular ziprasidone, with intramuscular haloperidol as a control, was conducted in patient volunteers. In the trial, ECGs were obtained at the time of maximum plasma concentration following two injections of ziprasidone (20 mg then 30 mg) or haloperidol (7.5 mg then 10 mg) given four hours apart. Note that a 30 mg dose of intramuscular ziprasidone is 50% higher than the recommended therapeutic dose. The mean change in QT<sub>c</sub> from baseline was calculated for each drug, using a sample-based correction that removes the effect of heart rate on the QT interval. The mean increase in QT<sub>c</sub> from baseline for ziprasidone was 4.6 msec following the first injection and 12.8 msec following the second injection. The mean increase in QT<sub>c</sub> from baseline for haloperidol was 6.0 msec following the first injection and 14.7 msec following the second injection. In this study, no patients had a QT<sub>c</sub> interval exceeding 500 msec. As with other antipsychotic drugs and placebo, sudden unexplained deaths have been reported in patients taking ziprasidone at recommended doses. The premarketing experience for ziprasidone did not reveal an excess risk of mortality for ziprasidone compared to other antipsychotic drugs or placebo, but the extent of exposure was limited, especially for the drugs used as active controls and placebo. Nevertheless, ziprasidone's larger prolongation of QT<sub>c</sub> length compared to several other antipsychotic drugs raises the possibility that the risk of sudden death may be greater for ziprasidone than for other available drugs for treating schizophrenia. This possibility needs to be considered in deciding among alternative drug products. Certain circumstances may increase the risk of the occurrence of torsade de pointes and/or sudden death in association with the use of drugs that prolong the QT<sub>c</sub> interval, including (1) bradycardia; (2) hypokalemia or hypomagnesemia; (3) concomitant use of other drugs that prolong the QT<sub>c</sub> interval; and (4) presence of congenital prolongation of the QT interval. **Electrolyte Disturbances May Increase The Risk of QT Prolongation** It is recommended that patients being considered for ziprasidone treatment who are at risk for significant electrolyte disturbances, hypokalemia in particular, have baseline serum potassium and magnesium measurements. Hypokalemia (and/or hypomagnesemia) may increase the risk of QT prolongation and arrhythmia. Hypokalemia may result from diuretic therapy, diarrhea, and other causes. Patients with low serum potassium and/or magnesium should be repleted with those electrolytes before proceeding with treatment. It is essential to periodically monitor serum electrolytes in patients for whom diuretic therapy is introduced during ziprasidone treatment. Persistently prolonged QT<sub>c</sub> intervals may also increase the risk of further prolongation and arrhythmia, but it is not clear that routine screening ECG measures are effective in detecting such patients. Rather, ziprasidone should be avoided in patients with histories of significant cardiovascular illness, e.g., QT prolongation, recent acute myocardial infarction, uncompensated heart failure, or cardiac arrhythmia. Ziprasidone should be discontinued in patients who are found to have persistent QT<sub>c</sub> measurements >500 msec. **Neuroleptic Malignant Syndrome (NMS)** A potentially fatal symptom complex sometimes referred to as Neuroleptic Malignant Syndrome (NMS) has been reported in association with administration of antipsychotic drugs. The management of NMS should include: (1) immediate discontinuation of antipsychotic drugs and other drugs not essential to concurrent therapy; (2) intensive symptomatic treatment and medical monitoring; and (3) treatment of any concomitant serious medical problems for which specific treatments are available. If a patient requires antipsychotic drug treatment after recovery from NMS, the potential reintroduction

of drug therapy should be carefully considered. The patient should be carefully monitored, since recurrences of NMS have been reported. **Tardive Dyskinesia** A syndrome of potentially irreversible, involuntary, dyskinetic movements may develop in patients undergoing treatment with antipsychotic drugs. Although the prevalence of the syndrome appears to be highest among the elderly, especially elderly women, it is impossible to rely upon prevalence estimates to predict, at the inception of antipsychotic treatment, which patients are likely to develop the syndrome. If signs and symptoms of tardive dyskinesia appear in a patient on ziprasidone, drug discontinuation should be considered. **Hyperglycemia and Diabetes Mellitus** Hyperglycemia-related adverse events, sometimes serious, have been reported in patients treated with atypical anti-psychotics. There have been few reports of hyperglycemia or diabetes in patients treated with GEODON, and it is not known if GEODON is associated with these events. Any patient treated with atypical antipsychotics should be monitored for symptoms of hyperglycemia.

## PRECAUTIONS

**Leukopenia, Neutropenia, and Agranulocytosis** In clinical trial and postmarketing experience, events of leukopenia/neutropenia and agranulocytosis (including fatal cases) have been reported temporally related to antipsychotic agents. Possible risk factors for leukopenia/neutropenia include pre-existing low white blood cell count (WBC) and history of drug induced leukopenia/neutropenia. Patients with a pre-existing low WBC or a history of drug induced leukopenia/neutropenia should have their complete blood count (CBC) monitored frequently during the first few months of therapy and should discontinue GEODON at the first sign of decline in WBC in the absence of other causative factors. Patients with neutropenia should be carefully monitored for fever or other symptoms or signs of infection and treated promptly if such symptoms or signs occur. Patients with severe neutropenia (absolute neutrophil count <1000/mm<sup>3</sup>) should discontinue GEODON and have their WBC followed until recovery. **Rash** In premarketing trials with ziprasidone, about 5% of patients developed rash and/or urticaria, with discontinuation of treatment in about one-sixth of these cases. The occurrence of rash was related to dose of ziprasidone, although the finding might also be explained by the longer exposure time in the higher dose patients. Several patients with rash had signs and symptoms of associated systemic illness, e.g., elevated WBCs. Most patients improved promptly with adjunctive treatment with antihistamines or steroids and/or upon discontinuation of ziprasidone, and all patients experiencing these reactions were reported to recover completely. Upon appearance of rash for which an alternative etiology cannot be identified, ziprasidone should be discontinued. **Orthostatic Hypotension** Ziprasidone may induce orthostatic hypotension associated with dizziness, tachycardia, and, in some patients, syncope, especially during the initial dose-titration period, probably reflecting its  $\alpha_1$ -adrenergic antagonist properties. Syncope was reported in 0.6% of the patients treated with ziprasidone. Ziprasidone should be used with particular caution in patients with known cardiovascular disease (history of myocardial infarction or ischemic heart disease, heart failure or conduction abnormalities), cerebrovascular disease, or conditions which would predispose patients to hypotension (dehydration, hypovolemia, and treatment with antihypertensive medications). **Seizures** In clinical trials, seizures occurred in 0.4% of patients treated with ziprasidone. There were confounding factors that may have contributed to the occurrence of seizures in many of these cases. As with other antipsychotic drugs, ziprasidone should be used cautiously in patients with a history of seizures or with conditions that potentially lower the seizure threshold, e.g., Alzheimer's dementia. Conditions that lower the seizure threshold may be more prevalent in a population of 65 years or older. **Dysphagia** Esophageal dysmotility and aspiration have been associated with antipsychotic drug use. Aspiration pneumonia is a common cause of morbidity and mortality in elderly patients, in particular those with advanced Alzheimer's dementia, and ziprasidone and other antipsychotic drugs should be used cautiously in patients at risk for aspiration pneumonia (see **BOXED WARNING** and **Increased Mortality in Elderly Patients with Dementia-Related Psychosis** in **WARNINGS**). **Hyperprolactinemia** As with other drugs that antagonize dopamine D<sub>2</sub> receptors, ziprasidone elevates prolactin levels in humans. Tissue culture experiments indicate that approximately one-third of human breast cancers are prolactin-dependent *in vitro*, a factor of potential importance if the prescription of these drugs is contemplated in a patient with previously detected breast cancer. Neither clinical studies nor epidemiologic studies conducted to date have shown an association between chronic

administration of this class of drugs and tumorigenesis in humans; the available evidence is considered too limited to be conclusive at this time. **Potential for Cognitive and Motor Impairment** Somnolence was a commonly reported adverse reaction in patients treated with ziprasidone. In the 4- and 6-week placebo-controlled trials, somnolence was reported in 14% of patients on ziprasidone compared to 7% of placebo patients. Somnolence led to discontinuation in 0.3% of patients in short-term clinical trials. Since ziprasidone has the potential to impair judgment, thinking, or motor skills, patients should be cautioned about performing activities requiring mental alertness, such as operating a motor vehicle (including automobiles) or operating hazardous machinery until they are reasonably certain that ziprasidone therapy does not affect them adversely. **Priapism** One case of priapism was reported in the premarketing database. **Body Temperature Regulation** Although not reported with ziprasidone in premarketing trials, disruption of the body's ability to reduce core body temperature has been attributed to antipsychotic agents. **Suicide** The possibility of a suicide attempt is inherent in psychotic illness and close supervision of high-risk patients should accompany drug therapy. Prescriptions for ziprasidone should be written for the smallest quantity of capsules consistent with good patient management in order to reduce overdose risk. **Patients With Concomitant Illnesses** Clinical experience with ziprasidone in patients with certain concomitant systemic illnesses is limited. Ziprasidone has not been evaluated or used to any appreciable extent in patients with a recent history of myocardial infarction or unstable heart disease. Patients with these diagnoses were excluded from premarketing clinical studies. Because of the risk of QTc prolongation and orthostatic hypotension with ziprasidone, caution should be observed in cardiac patients (see **QT Prolongation and Risk of Sudden Death** in **WARNINGS** and **Orthostatic Hypotension** in **PRECAUTIONS**). **Information for Patients** To assure safe and effective use of GEODON, the information and instructions provided in the patient information should be discussed with patients. **Laboratory Tests** Patients being considered for ziprasidone treatment who are at risk of significant electrolyte disturbances should have baseline serum potassium and magnesium measurements. Low serum potassium and magnesium should be replaced before proceeding with treatment. Patients who are started on diuretics during Ziprasidone therapy need periodic monitoring of serum potassium and magnesium. Discontinue ziprasidone in patients who are found to have persistent QTc measurements >500 msec (see **WARNINGS**).

## DRUG INTERACTIONS

(1) Ziprasidone should not be used with any drug that prolongs the QT interval. (2) Given the primary CNS effects of ziprasidone, caution should be used when it is taken in combination with other centrally acting drugs. (3) Because of its potential for inducing hypotension, ziprasidone may enhance the effects of certain antihypertensive agents. (4) Ziprasidone may antagonize the effects of levodopa and dopamine agonists. **Effect of Other Drugs on Ziprasidone** *Carbamazepine*, 200 mg bid for 21 days, resulted in a decrease of approximately 35% in the AUC of ziprasidone. Ketoconazole, a potent inhibitor of CYP3A4, 400 mg qd for 5 days, increased the AUC and C<sub>max</sub> of ziprasidone by about 35-40%. *Cimetidine*, 800 mg qd for 2 days, did not affect ziprasidone pharmacokinetics. Co-administration of 30 mL of Maalox® did not affect ziprasidone pharmacokinetics. Population pharmacokinetic analysis of schizophrenic patients enrolled in controlled clinical trials has not revealed evidence of any clinically significant pharmacokinetic interactions with benzotropine, propranolol, or lorazepam. **Effect of Ziprasidone on Other Drugs** *In vitro* studies revealed little potential for ziprasidone to interfere with the metabolism of drugs cleared primarily by CYP1A2, CYP2C9, CYP2C19, CYP2D6 and CYP3A4, and little potential for drug interactions with ziprasidone due to displacement. Ziprasidone 40 mg bid administered concomitantly with *lithium* 450 mg bid for 7 days did not affect the steady-state level or renal clearance of lithium. *In vivo* studies have revealed no effect of ziprasidone on the pharmacokinetics of estrogen or progesterone components. Ziprasidone 20 mg bid did not affect the pharmacokinetics of concomitantly administered *oral contraceptives*, ethinyl estradiol (0.03 mg) and levonorgestrel (0.15 mg). Consistent with *in vitro* results, a study in normal healthy volunteers showed that ziprasidone did not alter the metabolism of *dextromethorphan*, a CYP2D6 model substrate, to its major metabolite, dextrorphan. There was no statistically significant change in the urinary dextromethorphan/dextrorphan ratio.

## NONCLINICAL TOXICOLOGY

**Carcinogenesis, Mutagenesis, Impairment of Fertility** Lifetime carcinogenicity studies were conducted with ziprasidone in Long Evans rats and CD-1 mice. In male mice, there was no increase in incidence of tumors relative to controls. In female mice, there were dose-related increases in the incidences of pituitary gland adenoma and carcinoma, and mammary gland adenocarcinoma at all doses tested. Increases in serum prolactin were observed in a 1-month dietary study in female, but not male, mice. Ziprasidone had no effect on serum prolactin in rats in a 5-week dietary study at the doses that were used in the carcinogenicity study. The relevance for human risk of the findings of prolactin-mediated endocrine tumors in rodents is unknown (see **Hyperprolactinemia** in **PRECAUTIONS**). **Mutagenesis:** There was a reproducible mutagenic response in the Ames assay in one strain of *S. typhimurium* in the absence of metabolic activation. Positive results were obtained in both the *in vitro* mammalian cell gene mutation assay and the *in vitro* chromosomal aberration assay in human lymphocytes. **Impairment of Fertility:** Ziprasidone increase time to copulation in Sprague-Dawley rats in two fertility and early embryonic development studies at doses of 10 to 160 mg/kg/day (0.5 to 8 times the MRHD of 200 mg/day on a mg/m<sup>2</sup> basis). Fertility rate was reduced at 160 mg/kg/day (8 times the MRHD on a mg/m<sup>2</sup> basis). There was no effect on fertility at 40 mg/kg/day (2 times the MRHD on a mg/m<sup>2</sup> basis). The fertility of female rats was reduced.

## USE IN SPECIFIC POPULATIONS

**Pregnancy** *Pregnancy Category C:* There are no adequate and well-controlled studies in pregnant women. Ziprasidone should be used during pregnancy only if the potential benefit justifies the potential risk to the fetus. **Labor and Delivery** The effect of ziprasidone on labor and delivery in humans is unknown. **Nursing Mothers** It is not known whether ziprasidone or its metabolites are excreted in human milk. It is recommended that women receiving ziprasidone should not breastfeed. **Pediatric Use** The safety and effectiveness of ziprasidone in pediatric patients have not been established. **Geriatric Use** Of the total number of subjects in clinical studies of ziprasidone, 2.4 percent were 65 and over. No overall differences in safety or effectiveness were observed between these subjects and younger subjects. Nevertheless, the presence of multiple factors that might increase the pharmacodynamic response to ziprasidone, or cause poorer tolerance or orthostasis, should lead to consideration of a lower starting dose, slower titration, and careful monitoring during the initial dosing period for some elderly patients.

## ADVERSE REACTIONS

**Adverse Findings Observed in Short-term, Placebo-Controlled Trials** The following findings are based on the short-term placebo-controlled premarketing trials for schizophrenia (a pool of two 6-week, and two 4-week fixed-dose trials) and bipolar mania (a pool of two 3-week flexible-dose trials) in which GEODON was administered in doses ranging from 10 to 200 mg/day. **Adverse Events Associated With Discontinuation** *Schizophrenia:* Approximately 4.1% (29/702) of ziprasidone-treated patients in short-term, placebo-controlled studies discontinued treatment due to an adverse reaction, compared with about 2.2% (6/273) on placebo. The most common reaction associated with dropout was rash, including 7 dropouts for rash among ziprasidone patients (1%) compared to no placebo patients (see **PRECAUTIONS**). *Bipolar Mania:* Approximately 6.5% (18/279) of ziprasidone-treated patients in short-term, placebo-controlled studies discontinued treatment due to an adverse reaction, compared with about 3.7% (5/136) on placebo. The most common reactions associated with dropout in the ziprasidone-treated patients were akathisia, anxiety, depression, dizziness, dystonia, rash and vomiting, with 2 dropouts for each of these reactions among ziprasidone patients (1%) compared to one placebo patient each for dystonia and rash (1%) and no placebo patients for the remaining adverse events. **Adverse Events at an Incidence of ≥5% and at Least Twice the Rate of Placebo** The most commonly observed adverse events associated with GEODON in schizophrenia trials were somnolence (14%) and respiratory tract infection (8%). The most commonly observed adverse events associated with the use of GEODON in bipolar mania trials were somnolence (31%), extrapyramidal symptoms (31%), dizziness (16%), akathisia (10%), abnormal vision (6%), asthenia (6%), and vomiting (5%). The following list enumerates the treatment-emergent adverse events that occurred during acute therapy, including only those events that

occurred in 2% of GEODON patients and at a greater incidence than in placebo. Schizophrenia: *Body as a Whole*—asthenia, accidental injury, chest pain. *Cardiovascular*—tachycardia. *Digestive*—nausea, constipation, dyspepsia, diarrhea, dry mouth, anorexia. *Nervous*—extrapyramidal symptoms, somnolence, akathisia, dizziness. *Respiratory*—respiratory tract infection, rhinitis, cough increased. *Skin and Appendages*—rash, fungal dermatitis. *Special Senses*—abnormal vision. Bipolar Mania: *Body as a Whole*—headache, asthenia, accidental injury. *Cardiovascular*—hypertension. *Digestive*—nausea, diarrhea, dry mouth, vomiting, increased salivation, tongue edema, dysphagia. *Musculoskeletal*—myalgia. *Nervous*—somnolence, extrapyramidal symptoms, dizziness, akathisia, anxiety, hypesthesia, speech disorder. *Respiratory*—pharyngitis, dyspnea. *Skin and Appendages*—fungal dermatitis. *Special Senses*—abnormal vision. **Dose Dependency** An analysis for dose response in the schizophrenia 4-study pool revealed an apparent relation of adverse reaction to dose for the following reactions: asthenia, postural hypotension, anorexia, dry mouth, increased salivation, arthralgia, anxiety, dizziness, dystonia, hypertonia, somnolence, tremor, rhinitis, rash, and abnormal vision. **Extrapyramidal Symptoms (EPS)** The incidence of reported EPS for ziprasidone patients in the short-term, placebo-controlled schizophrenia trials was 14% vs. 8% for placebo. Objectively collected data from those trials on the Simpson-Angus Rating Scale (for EPS) and the Barnes Akathisia Scale (for akathisia) did not generally show a difference between ziprasidone and placebo. **Dystonia** Symptoms of dystonia, prolonged abnormal contractions of muscle groups, may occur in susceptible individuals during the first few days of treatment. While these symptoms can occur at low doses, they occur more frequently and with greater severity with high potency and at higher doses of first generation antipsychotic drugs. Elevated risk of acute dystonia is observed in males and younger age groups. **Vital Sign Changes** Ziprasidone is associated with orthostatic hypotension (see **PRECAUTIONS**). **Weight Gain** In short-term schizophrenia trials, the proportions of patients meeting a weight gain criterion of  $\geq 7\%$  of body weight were compared, revealing a statistically significantly greater incidence of weight gain for ziprasidone (10%) compared to placebo (4%). A median weight gain of 0.5 kg was observed in ziprasidone patients compared to no median weight change in placebo patients. Weight gain was reported as an adverse event in 0.4% of both ziprasidone and placebo patients. During long-term therapy with ziprasidone, a categorization of patients at baseline on the basis of body mass index (BMI) revealed the greatest mean weight gain and highest incidence of clinically significant weight gain ( $>7\%$  of body weight) in patients with low BMI ( $<23$ ) compared to normal (23-27) or overweight patients ( $>27$ ). There was a mean weight gain of 1.4 kg for those patients with a “low” baseline BMI, no mean change for patients with a “normal” BMI, and a 1.3 kg mean weight loss for patients who entered the program with a “high” BMI. **ECG Changes** Ziprasidone is associated with an increase in the QT<sub>c</sub> interval (see **WARNINGS**). In the schizophrenia trials, ziprasidone was associated with a mean increase in heart rate of 1.4 beats per minute compared to a 0.2 beats per minute decrease among placebo patients. **Other Adverse Events Observed During the Premarketing Evaluation of Ziprasidone in Schizophrenia** Frequent adverse events are those occurring in at least 1/100 patients; infrequent adverse events are those occurring in 1/100 to 1/1000 patients; rare adverse events are those occurring in fewer than 1/1000 patients. *Body as a Whole*—Frequent: abdominal pain, flu syndrome, fever, accidental fall, face edema, chills, photosensitivity reaction, flank pain, hypothermia, motor vehicle accident. *Cardiovascular System*—Frequent: tachycardia, hypertension, postural hypotension. Infrequent: bradycardia, angina pectoris, atrial fibrillation. Rare: first degree AV block, bundle branch block, phlebitis, pulmonary embolus, cardiomegaly, cerebral infarct, cerebrovascular accident, deep thrombophlebitis, myocarditis, thrombophlebitis. *Digestive System*—Frequent: anorexia, vomiting. Infrequent: rectal hemorrhage, dysphagia, tongue edema. Rare: gum hemorrhage, jaundice, fecal impaction, gamma glutamyl trans-peptidase increased, hematemesis, cholestatic jaundice, hepatitis, hepatomegaly, leukoplakia of mouth, fatty liver deposit, melena. *Endocrine*—Rare: hypothyroidism, hyperthyroidism, thyroiditis. *Hemic and Lymphatic System*—Infrequent: anemia, ecchymosis, leukocytosis, leukopenia, eosinophilia, lymphadenopathy. Rare: thrombocytopenia, hypochromic anemia, lymphocytosis, monocytosis, basophilia, lymphedema, polycythemia, thrombocythemia. *Metabolic and Nutritional Disorders*—Infrequent: thirst, transaminase increased, peripheral edema, hyperglycemia, creatine phosphokinase

increased, alkaline phosphatase increased, hypercholesteremia, dehydration, lactic dehydrogenase increased, albuminuria, hypokalemia. Rare: BUN increased, creatinine increased, hyperlipemia, hypocholesteremia, hyperkalemia, hypochloremia, hypoglycemia, hyponatremia, hypoproteinemia, glucose tolerance decreased, gout, hyperchloremia, hyperuricemia, hypocalcemia, hypoglycemic reaction, hypomagnesemia, ketosis, respiratory alkalosis. *Musculoskeletal System*—Frequent: myalgia. Infrequent: tenosynovitis. Rare: myopathy. *Nervous System*—Frequent: agitation, extrapyramidal syndrome, tremor, dystonia, hypertonia, dyskinesia, hostility, twitching, paresthesia, confusion, vertigo, hypokinesia, hyperkinesia, abnormal gait, oculogyric crisis, hypesthesia, ataxia, amnesia, cogwheel rigidity, delirium, hypotonia, akinesia, dysarthria, withdrawal syndrome, buccoglossal syndrome, choreoathetosis, diplopia, incoordination, neuropathy. Infrequent: paralysis. Rare: myoclonus, nystagmus, torticollis, circumoral paresthesia, opisthotonos, reflexes increased, trismus. *Respiratory System*—Frequent: dyspnea. Infrequent: pneumonia, epistaxis. Rare: hemoptysis, laryngismus. *Skin and Appendages*—Infrequent: maculopapular rash, urticaria, alopecia, eczema, exfoliative dermatitis, contact dermatitis, vesiculobullous rash. *Special Senses*—Frequent: fungal dermatitis. Infrequent: conjunctivitis, dry eyes, tinnitus, blepharitis, cataract, photophobia. Rare: eye hemorrhage, visual field defect, keratitis, keratoconjunctivitis. *Urogenital System*—Infrequent: impotence, abnormal ejaculation, amenorrhea, hematuria, menorrhagia, female lactation, polyuria, urinary retention, metrorrhagia, male sexual dysfunction, anorgasmia, glycosuria. Rare: gynecomastia, vaginal hemorrhage, nocturia, oliguria, female sexual dysfunction, uterine hemorrhage. **Adverse Findings Observed in Trials of Intramuscular Ziprasidone** In these studies, the most commonly observed adverse reactions associated with the use of intramuscular ziprasidone ( $\geq 5\%$ ) and observed at a rate on intramuscular ziprasidone (in the higher dose groups) at least twice that of the lowest intramuscular ziprasidone group were headache (13%), nausea (12%), and somnolence (20%). **Adverse Events at an Incidence of  $\geq 1\%$  in Short-Term Fixed-Dose Intramuscular Trials** The following list enumerates the treatment-emergent adverse events that occurred in  $\geq 1\%$  of patients during acute therapy with intramuscular ziprasidone: *Body as a Whole*—headache, injection site pain, asthenia, abdominal pain, flu syndrome, back pain. *Cardiovascular*—postural hypotension, hypertension, bradycardia, vasodilation. *Digestive*—nausea, rectal hemorrhage, diarrhea, vomiting, dyspepsia, anorexia, constipation, tooth disorder, dry mouth. *Nervous*—dizziness, anxiety, insomnia, somnolence, akathisia, agitation, extrapyramidal syndrome, hypertonia, cogwheel rigidity, paresthesia, personality disorder, psychosis, speech disorder. *Respiratory*—rhinitis. *Skin and Appendages*—furunculosis, sweating. *Urogenital*—dysmenorrhea, priapism. **Other Events Observed During Post-marketing Use** Adverse reaction reports not listed above that have been received since market introduction include rare occurrences of the following—*Cardiac Disorders*: Tachycardia, torsade de pointes (in the presence of multiple confounding factors), (see **WARNINGS**); *Digestive System Disorders*: Swollen Tongue; *Reproductive System and Breast Disorders*: Galactorrhea, priapism; *Nervous System Disorders*: Facial Droop, neuroleptic malignant syndrome, serotonin syndrome (alone or in combination with serotonergic medicinal products), tardive dyskinesia; *Psychiatric Disorders*: Insomnia, mania/hypomania; *Skin and subcutaneous Tissue Disorders*: Allergic reaction (such as allergic dermatitis, angioedema, orofacial edema, urticaria), rash; *Urogenital System Disorders*: Enuresis, urinary incontinence; *Vascular Disorders*: Postural hypotension, syncope.

## DRUG ABUSE AND DEPENDENCE

**Controlled Substance Class** Ziprasidone is not a controlled substance.

## OVERDOSAGE

In premarketing trials in over 5400 patients, accidental or intentional overdose of oral ziprasidone was documented in 10 patients. All patients survived without sequelae. In the patient taking the largest confirmed amount (3240 mg), the only symptoms reported were minimal sedation, slurring of speech, and transitory hypertension (200/95).

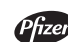

## BIPOLAR I MAINTENANCE TREATMENT

# GEODON + LITHIUM OR VALPROATE PROVEN SUPERIOR TO LITHIUM OR VALPROATE ALONE IN PREVENTING RELAPSE

## **GEODON**<sup>®</sup> (ziprasidone HCl) *Capsules*

GEODON is indicated for acute treatment as monotherapy of manic or mixed episodes associated with bipolar I disorder and for maintenance treatment of bipolar I disorder as an adjunct to lithium or valproate. For full symptoms and diagnostic criteria, see the *DSM-IV-TR*<sup>®</sup> (2000).

### IMPORTANT SAFETY INFORMATION

**Elderly patients with dementia-related psychosis treated with antipsychotic drugs are at an increased risk of death compared to placebo. GEODON is not approved for the treatment of patients with dementia-related psychosis.**

GEODON is contraindicated in patients with a known history of QT prolongation, recent acute myocardial infarction, or uncompensated heart failure, and should not be used with certain other QT-prolonging drugs. GEODON has a greater capacity to prolong the QT<sub>c</sub> interval than several antipsychotics. In some drugs, QT prolongation has been associated with torsade de pointes, a potentially fatal arrhythmia. In many cases this would lead to the conclusion that other drugs should be tried first. Hypokalemia may increase the risk of QT prolongation and arrhythmia.

As with all antipsychotic medications, a rare and potentially fatal condition known as neuroleptic malignant syndrome (NMS) has been reported with GEODON. NMS can cause hyperpyrexia, muscle rigidity, diaphoresis, tachycardia, irregular pulse or blood pressure, cardiac dysrhythmia, and altered mental status. If signs and symptoms appear, immediate discontinuation, treatment, and monitoring are recommended.

Prescribing should be consistent with the need to minimize tardive dyskinesia (TD), a potentially irreversible dose- and duration-dependent syndrome. If signs and symptoms appear, discontinuation should be considered since TD may remit partially or completely.

Hyperglycemia-related adverse events, sometimes serious, have been reported in patients treated with atypical antipsychotics. There have been few reports of hyperglycemia or diabetes in patients treated with GEODON, and it is not known if GEODON is associated with these events. Patients treated with an atypical antipsychotic should be monitored for symptoms of hyperglycemia.

Precautions include the risk of rash, orthostatic hypotension, and seizures.

The most common adverse events associated with GEODON in bipolar mania were somnolence, extrapyramidal symptoms, dizziness, akathisia, and abnormal vision.

The most common adverse events (≥5%) associated with GEODON in the bipolar maintenance study were tremor and insomnia.

*Please see brief summary of prescribing information on adjacent page. For more information, please visit [www.pfizerpro.com/GEODON](http://www.pfizerpro.com/GEODON)*
