# THE AMERICAN JOURNAL OF PSYCHIATRY

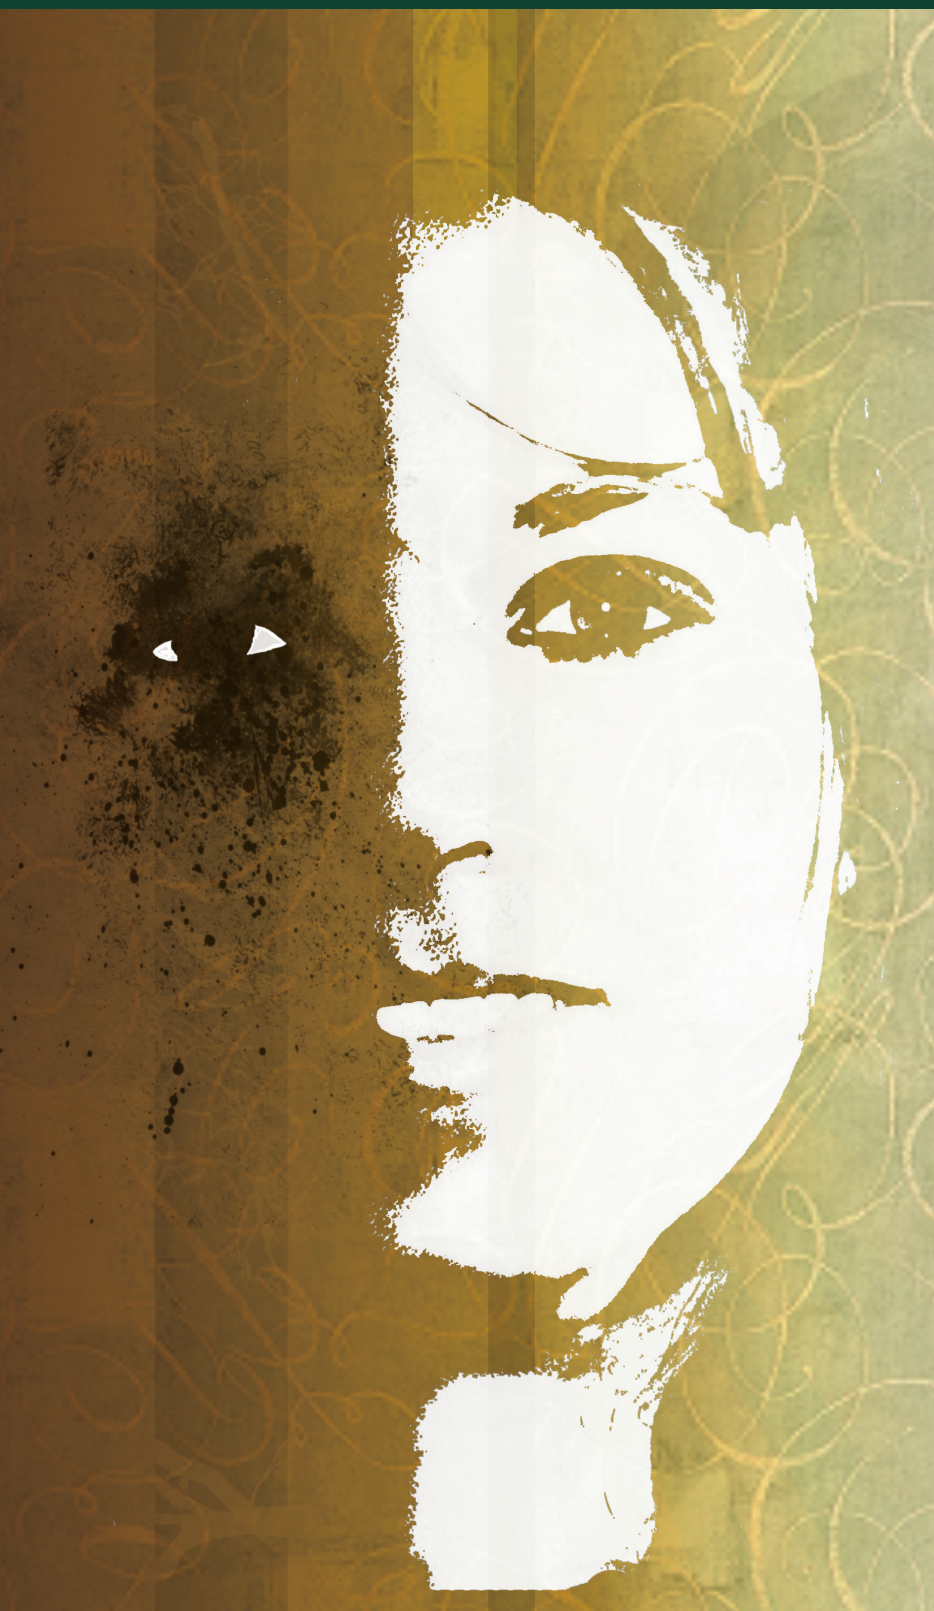

- ◀ **Emotion Modulation in PTSD: Clinical and Neurobiological Evidence for a Dissociative Subtype**  
Ruth A. Lanius, M.D, Ph.D., et al. 640
- Time to Attainment of Recovery From Borderline Personality Disorder and Stability of Recovery: A 10-year Prospective Follow-Up Study**  
Mary C. Zanarini, Ed.D., et al. 663
- A Double-Blind, Placebo-Controlled Trial Combining Sertraline and Naltrexone for Treating Co-Occurring Depression and Alcohol Dependence**  
Helen M. Pettinati, Ph.D., et al. 668
- International Consensus Study of Antipsychotic Dosing**  
David M. Gardner, Pharm.D., M.Sc., et al. 686
- Continuing Medical Education** 727

**June 2010**

**Volume 167 • Number 6**

---

Official Journal of the  
AMERICAN PSYCHIATRIC ASSOCIATION

---

[ajp.psychiatryonline.org](http://ajp.psychiatryonline.org)
