# THE AMERICAN JOURNAL OF PSYCHIATRY

## EDITOR-IN-CHIEF

Robert Freedman, M.D.

## DEPUTY EDITORS

David A. Lewis, M.D.

Robert Michels, M.D.

Daniel S. Pine, M.D.

Susan K. Schultz, M.D.

Carol A. Tamminga, M.D.

## EDITORIAL STAFF

### Editorial Director

Michael D. Roy

### Senior Editor/Features Writer

Jane Weaver, E.L.S.

### Senior Editor

John J. Guardiano, Ph.D.

### Production Manager

Julie C. Blair

### Graphic Designer

Steve Hennessey

### Assistant Editor

Angela Moore

### Editorial Support Services

#### Manager

Kourtney Skinner

### Editorial Assistant

Samantha Luck

### Assistants to the Editors

Lois Lilienthal

Laura Friedrich

Rachel Hogg

Russell A. Scholl

## ASSOCIATE EDITORS

Kathleen T. Brady, M.D., Ph.D.

David A. Brent, M.D.

Linda Brzustowicz, M.D.

Cameron S. Carter, M.D.

Howard H. Goldman, M.D., Ph.D.

Daniel C. Javitt, M.D.

Bankole Johnson, M.D.

Ellen Leibenluft, M.D.

Jeffrey A. Lieberman, M.D.

Barbara Milrod, M.D.

Maria A. Oquendo, M.D.

Jerrold F. Rosenbaum, M.D.

A. John Rush, M.D.

Larry J. Siever, M.D.

Patricia Suppes, M.D., Ph.D.

Myrna M. Weissman, Ph.D.

## EDITOR EMERITA

Nancy C. Andreasen, M.D., Ph.D.

## FORMER EDITORS

Amariah Brigham, M.D.  
1844-1849

T. Romeyn Beck, M.D.  
1849-1854

John P. Gray, M.D.  
1854-1886

G. Alder Blumer, M.D.  
1886-1894

Richard Dewey, M.D.  
1894-1897

Henry M. Hurd, M.D.  
1897-1904

Edward N. Brush, M.D.  
1904-1931

Clarence B. Farrar, M.D.  
1931-1965

Francis J. Braceland, M.D.  
1965-1978

John C. Nemiah, M.D.  
1978-1993

The American Journal of Psychiatry in online at [ajp.psychiatryonline.org](http://ajp.psychiatryonline.org)

# READ The American Journal of PSYCHIATRY ONLINE

## ONLINE BENEFITS

### AJP in Advance

Receive key research articles posted on the AJP website well in advance of their appearance in print.

### Back Issue Access

Gain access to back issues starting with Volume 1, Issue 1 of the American Journal of Insanity in 1844. (Available to institutions as a separate one-time purchase.)

### AJP CME

Take interactive quizzes that offer AMA PRA Category 1 Credits™ for selected articles from each issue (with paid subscription to the CME Course Program).

### AJP Audio

Listen to MP3-format program summarizing findings from key articles from each issue.

### Residents' Journal

Read additional AJP articles and features that have most value to residents in their training.

### Powerful Searching

Search by author, keyword, and/or citation details—within any one journal, across the entire PsychiatryOnline journal collection, or across all HighWire journals.

### PubMed, CrossRef, and Google Scholar links

Explore everything from cited references to abstracts and full text; to similar articles; to other articles by the same lead authors.

### eTOCs

Get advanced email alerts with the table of contents of the latest issue.

ACTIVATE  
NOW!

IT'S AS EASY AS...

2 Under  
SUBSCRIBE  
NOW, click  
"Activate  
Your Online  
Access"

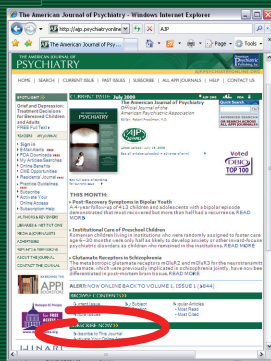

Go to [ajp.psychiatryonline.org](http://ajp.psychiatryonline.org)

3 Enter your APA Member Number. (This can be found on your mailing label.)

AJF 3000056866 CAR-RT LOT88 C-105  
John Q Sample  
Mental Health Professional  
1000 Wilson Blvd STE 1825  
Arlington VA 22209-3924 01654

\*In most cases the number on your label will be your Member Number; if it is not, enter your APA Member Number (with enough leading zeros to create 10 digits).

For more information or if you cannot locate your customer number, please contact APPI Customer Service:

1.800.368.5777  
APPI@PSYCH.ORG

# The Residents' JOURNAL

Last Issue's

## Table of Contents

- 1 Editorial  
Sarah B. Johnson, M.D.
- 2 Understanding Suicide: An Interview With Dr. Nancy Rappaport  
Ruth Gerson, M.D.
- 4 New Outlook on an Old Problem: Antisocial Personality Disorder  
Partam Manalai, M.D.
- 5 An Education  
Matthew L. Prowler, M.D.
- 6 The Cocoon of Countertransference  
Deepak Kumar, M.D.
- 7 Neurosyphilis: A Case Report and Review of the Literature  
Ashley R. Sholes, M.D.
- 10 Walking Out the Door  
Tracey Nicole Liebman, B.A.

The Residents' Journal is sent free-of-charge to all psychiatry residents. Anyone interested in being included on the distribution list should contact Angela Moore, the Residents' Journal staff editor at [ajp@psych.org](mailto:ajp@psych.org) with "Subscribe to Residents' Journal" in the subject line.

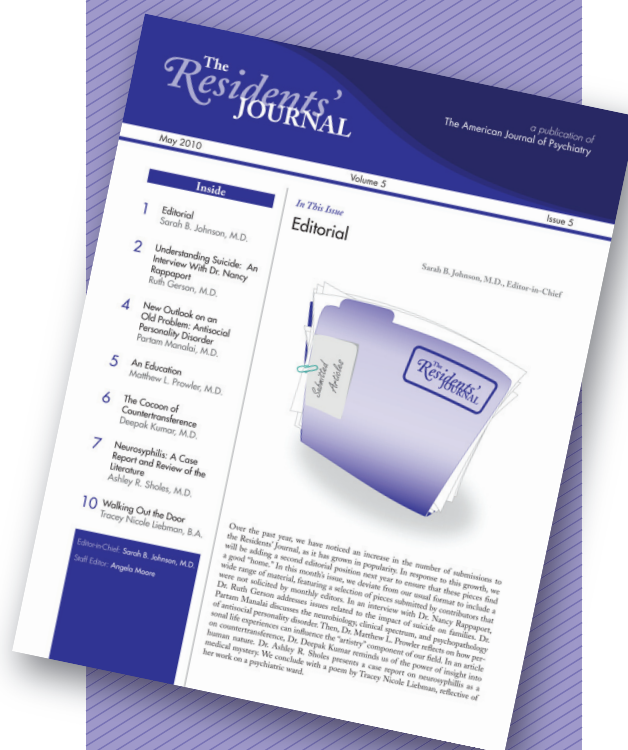

a publication of  
The American Journal of Psychiatry

**A19 Editorial Board**

**A21 Highlights of this issue**

**Editorials**

**423 Black-skies planning? Prioritising mental health services in times of austerity**

D. McDaid and M. Knapp

**425 Cigarette smoking and depression: a question of causation**

M.R. Munafò and R. Araya

**427 What's so special about conversion disorder? A problem and a proposal for diagnostic classification**

R.A. Kanaan, A. Carson, S.C. Wessely, T.R. Nicholson, S. Aybek, and A.S. David

**In debate**

**429 The increased use of antidepressants has contributed to the worldwide reduction in suicide rates**

G. Isacson and C.L. Rich / J. Jureidini and M. Raven

**Review article**

**434 Efficacy of atypical v. typical antipsychotics in the treatment of early psychosis: meta-analysis**

N.A. Crossley, M. Constante, P. McGuire, and P. Power

**439 On therapy – extra**

Ramy Daoud

**Papers**

**440 Cigarette smoking and depression: tests of causal linkages using a longitudinal birth cohort**

J.M. Boden, D.M. Fergusson, and L.J. Horwood

**447 Psychosis reactivity to cannabis use in daily life: an experience sampling study**

C. Henquet, J. van Os, R. Kuepper, P. Delespaul, M. Smits, J. à Campo, and I. Myin-Germeys

**454 Outcome of first-episode schizophrenia in India: longitudinal study of effect of insight and psychopathology**

B. Saravanan, K.S. Jacob, S. Johnson, M. Prince, D. Bhugra, and A.S. David

**460 An early improvement threshold to predict response and remission in first-episode schizophrenia**

R. Schennach-Wolff, F.H. Seemüller, A. Mayr, W. Maier, S. Klingberg, I. Heuser, J. Klosterkötter, M. Gastpar, H. Häfner, H. Sauer, F. Schneider, W. Gaebel, M. Jäger, H.-J. Möller, and M. Riedel

**467 Cohort-specific risk of suicide for different mental disorders in China**

Y. Tong and M.R. Phillips

**473 A psychiatrist is . . . – in 100 words**

Nick Craddock

**474 Effect of electroconvulsive therapy on brain 5-HT<sub>2</sub> receptors in major depression**

L.N. Yatham, P.F. Liddle, R.W. Lam, A.P. Zis, A.J. Stoessl, V. Sossi, M.J. Adam, and T.J. Ruth

**480 Family carers' distress and abusive behaviour: longitudinal study**

C. Cooper, M. Blanchard, A. Selwood, Z. Walker, and G. Livingston

**485 Viruses – poems by doctors**

Glenn Colquhoun

**486 Internet addiction: prevalence, discriminant validity and correlates among adolescents in Hong Kong**

K.-W. Fu, W.S.C. Chan, P.W.C. Wong, and P.S.F. Yip

**Short report**

**493 Combined catecholamine and indoleamine depletion following response to ECT**

F. Cassidy, R.D. Weiner, T.B. Cooper, and B.J. Carroll

**Columns**

**495 Correspondence**

**497 Correction**

**498 Book reviews**

**500 Contents of *Advances in Psychiatric Treatment***

**501 Contents of the *American Journal of Psychiatry***

**502 From the Editor's desk**

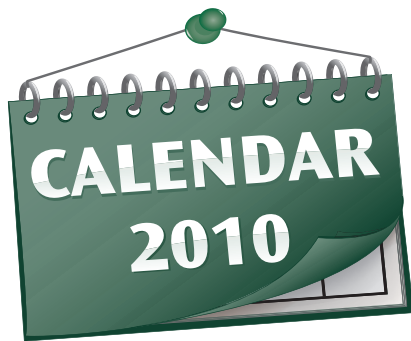

For free listing of your organization's official annual or regional meeting, please send us the following information: sponsor, location, inclusive dates, type and number of continuing education credits (if available), and the name, address, and telephone number of the person or group to contact for more information. In order for an event to appear in our listing, all notices and changes must be received at least 6 months in advance of the meeting and should be addressed to:

**Calendar, American Journal of Psychiatry, 1000 Wilson Boulevard, Suite 1825, Arlington, VA 22209-3901, [jblair@psych.org](mailto:jblair@psych.org) (e-mail).**

*Because of space limitations, only listings of meetings of the greatest interest to Journal readers will be included.*

---

## JULY

**July 1–3**, 1st International Congress on Borderline Personality Disorder, Berlin Germany. Contact: Thorsten Kienast, MD, [thorsten.kienast@charite.de](mailto:thorsten.kienast@charite.de) (e-mail) 011-49-(0)30-2311 2928 (tel), [www.borderline-congress-org](http://www.borderline-congress-org) (web site).

---

## SEPTEMBER

**September 14–19**, 1st joint annual meeting of the EEG and Clinical Neuroscience Society (ECNS), International Society for Neuroimaging in Psychiatry (ISNIP) and the International Society for Brain Electromagnetic Topography (IS-BET), Istanbul, Turkey. Contact: Kemal Arikan [mkarikan@istanbul.edu.tr](mailto:mkarikan@istanbul.edu.tr) (e-mail) [www.ecns2010.com](http://www.ecns2010.com) (web site).

---

## OCTOBER

**October 14–17**, 62nd Institute on Psychiatric Services, American Psychiatric Association, Boston, MA. Contact: Jill Gruber, APA Annual Meetings Dept., 1000 Wilson Blvd., Ste. 1825, Arlington, VA 22209; (703) 907-7815.

**October 22–24**, International Conference on Schizophrenia: ICONS IV, Chennai, India. Contact: Dr.R.Thara, Director, SCARF INDIA, [scarf@vsnl.com](mailto:scarf@vsnl.com), [info@icons-scarf.org](mailto:info@icons-scarf.org) (e-mail).

**October 26–31**, 57th Annual Meeting of the American Academy of Child and Adolescent Psychiatry, New York, NY. Contact: AACAP, 3615 Wisconsin Avenue, N.W., Washington, DC 20016-3007; (202) 966-7300 (tel), (202) 966-2891 (fax), [meetings@aacap.org](mailto:meetings@aacap.org) (e-mail), [www.aacap.org](http://www.aacap.org) (web site).

---

## MAY 2011

**May 14–19**, 164th Annual Meeting of the American Psychiatric Association, Honolulu, HI. Contact: Cathy Nash, APA Annual Meetings Dept., 1000 Wilson Blvd., Ste. 1825, Arlington, VA 22209; (703) 907-7822.

---

## OCTOBER

**October 5–8**, II International Congress, Dual Disorders, Addictive Behaviors and other Mental Disorders, Barcelona, Spain. Contact: SEPD, [www.cipd2011.com](http://www.cipd2011.com) (web site).

**October 18–23**, 58th Annual Meeting of the American Academy of Child and Adolescent Psychiatry, Toronto, Ontario. Contact: AACAP, 3615 Wisconsin Avenue, N.W., Washington, DC 20016-3007; (202) 966-7300 (tel), (202) 966-2891 (fax), [meetings@aacap.org](mailto:meetings@aacap.org) (e-mail), [www.aacap.org](http://www.aacap.org) (web site).

**October 27–30**, 63rd Institute on Psychiatric Services, American Psychiatric Association, San Francisco, CA. Contact: Jill Gruber, APA Annual Meetings Dept., 1000 Wilson Blvd., Ste. 1825, Arlington, VA 22209; (703) 907-7815.

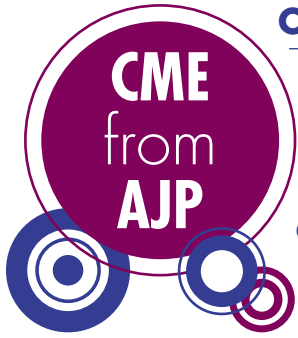

## Continuing Medical Education

Three articles in this issue form the basis of a short course with questions that can be answered for up to 1 *AMA PRA Category 1 Credit™* each by visiting <http://cme.psychiatryonline.org/> and clicking on “American Journal of Psychiatry CME.”

CME credit is issued only online, and a paid subscription to the AJP CME course program is required.

This month’s courses appear on pages 727–730.

**FREE AUDIO!**

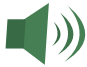

## Have You Heard?

You can listen to highlights of *The American Journal of Psychiatry* by downloading a monthly free .mp3 audio file from our web site (<http://ajp.psychiatryonline.org/misc/audio.dtl>) or by subscribing to the AJP Audio podcast at iTunes or other feed reader (e.g., NewzCrawler, FeedDemon, Bloglines, Google Reader). Presented by Deputy Editor Dr. Susan Schultz or by Editorial Director Michael Roy, each month’s audio lasts approximately 30 minutes and covers several research articles, the Treatment in Psychiatry feature, and one or two editorials.

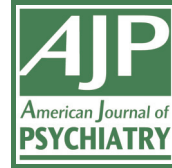

Coming in the July 2010 issue\*

## THE AMERICAN JOURNAL OF PSYCHIATRY

### *Mental Disorders and Suicide Among Young Rural Chinese: A Case-Control Psychological Autopsy Study*

J. Zhang, S. Xiao, and L. Zhou

### *Treatment of Resistant Depression in Adolescents (TORDIA): Week 24 Outcomes*

G.J. Emslie, T. Mayes, G. Porta, B. Vitiello, G. Clarke, K.D. Wagner, J.R. Asarnow, A. Spirito, B. Birmaher, N. Ryan, B. Kennard, L. DeBar, J. McCracken, M. Strober, M. Onorato, J. Zelazny, M. Keller, S. Iyengar, and D. Brent

### *Efficacy and Safety of Long-Term Fluoxetine Versus Lithium Monotherapy of Bipolar II Disorder: A Randomized, Double-Blind, Placebo-Substitution Study*

J.D. Amsterdam and J. Shults

### *Incidence and Predictors of Suicide Attempts in DSM-IV Major Depressive Disorder: A Five-Year Prospective Study*

K.M. Holma, T.K. Melartin, J. Haukka, I.A.K. Holma, T.P. Sokero, and E.T. Isometsä

\*Can’t wait? Visit [ajp.psychiatryonline.org](http://ajp.psychiatryonline.org) and click the “AJP in Advance” logo to see all articles uploaded in advance of print!



# get CME from AJP

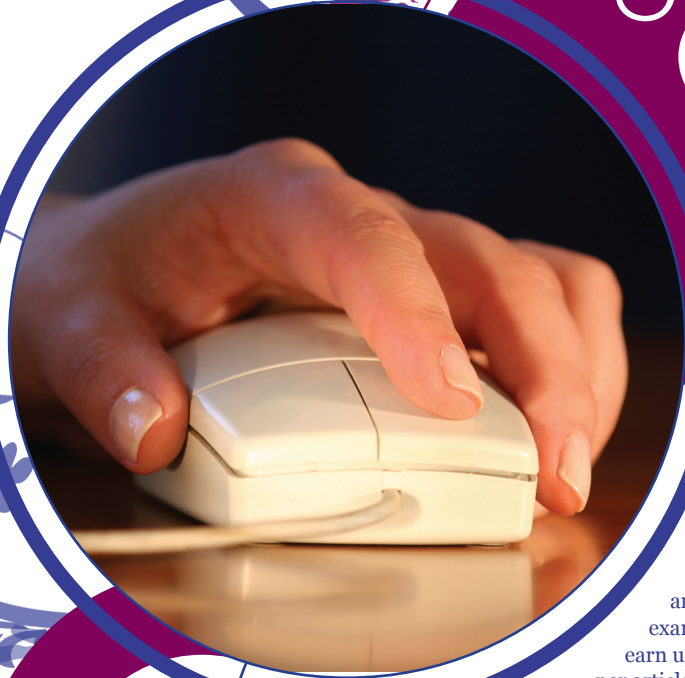

Brief companion exams are created for three of the most influential articles from each issue. By reading the articles and completing the online exams, you can test your knowledge and earn up to 1 *AMA PRA Category 1 Credit*<sup>™</sup> per article. Correct answers are highlighted for your reference upon completion of the course; there is no minimum threshold score necessary for the credit. A link from the question to the correct answer in context will also be highlighted in the associated article, thus extending the learning experience.

CME credit is only provided online, and a subscription to the AJP CME program is required. From the moment you subscribe to the AJP CME program, you will be able to select from 72 courses from among 40 possible subject areas. You'll also be able to access the next 33 courses as they become available. For more information and pricing, please go to <http://cme.psychiatryonline.org/misc/aboutajpcme.shtml>

This activity is sponsored by the American Psychiatric Association. The American Psychiatric Association is accredited by the Accreditation Council for Continuing Medical Education to provide continuing medical education for physicians. The American Psychiatric Association designates each educational activity for a maximum of 1 *AMA PRA Category 1 Credit*<sup>™</sup>. Physicians should only claim credit commensurate with the extent of their participation in the activity.

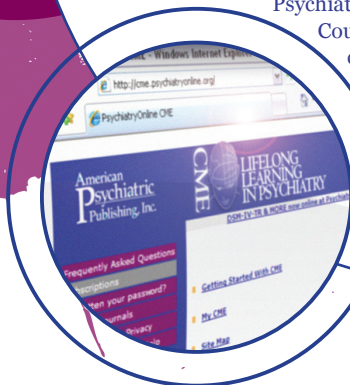

Fulfill your CME requirement while staying current on the latest advances in psychiatry.  
**Subscribe to AJP CME!**

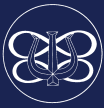

# Psychiatry and Clinical Neurosciences

**Edited by:** Masatoshi Takeda and Hiroshi Kurita | **Frequency:** Bi-monthly | **Impact Factor:** 1.394\*

\*Thomson Reuters Journal Citation Reports, 2008, Science Edition®

**Volume 64 Number 2, April 2010**

## Regular Articles

- 111 Relationship of alexithymia and temperament and character dimensions with lifetime post-traumatic stress disorder in male alcohol-dependent inpatients  
C. Evren, E. Dalbudak, R. Cetin, M. Durkaya and B. Evren
- 120 Factors associated with postpartum depression and abusive behavior in mothers with infants  
H. Choi, T. Yamashita, Y. Wada, J. Narumoto, H. Nanri, A. Fujimori, H. Yamamoto, S. Nishizawa, D. Masaki and K. Fukui
- 128 Randomized, single-blind, trial of sertraline and buspirone for treatment of elderly patients with generalized anxiety disorder  
N. Mokhber, M. R. Azarpazhooh, M. Khajehdaluae, A. Velayati and M. Hopwood
- 134 Clinical utility of the Chinese version of the Pediatric Daytime Sleepiness Scale in children with obstructive sleep apnea syndrome and narcolepsy  
C-M. Yang, Y-S. Huang and Y-C. Song
- 141 Characteristics of the tree-drawing test in chronic schizophrenia  
A. Kaneda, N. Yasui-Furukori, M. Saito, N. Sugawara, T. Nakagami, H. Furukori and S. Kaneko
- 149 Peritraumatic Distress Inventory as a predictor of post-traumatic stress disorder after a severe motor vehicle accident  
D. Nishi, Y. Matsuoka, N. Yonemoto, H. Noguchi, Y. Kim and S. Kanba
- 157 Regional cerebral blood flow changes in female to male gender identity disorder  
H. Nawata, K. Ogomori, M. Tanaka, R. Nishimura, H. Urashima, R. Yano, K. Takano and Y. Kuwabara
- 162 A single-blind, comparative study of zotepine versus haloperidol in combination with a mood stabilizer for patients with moderate-to-severe mania  
H-Y. Chan, S-H. Jou, Y-Y. Juang, C-J. Chang, J-J. Chen, C-H. Chen and N-Y. Chiu
- 170 The prevalence of restless legs syndrome in Taiwanese adults  
N-H. Chen, L-P. Chuang, C-T. Yang, C. A. Kushida, S-C. Hsu, P-C. Wang, S-W. Lin, Y-T. Chou, R-S. Chen, H-Y. Li and S-C. Lai
- 179 Predictors of antidepressant adherence: Results of a Japanese Internet-based survey  
J. Shigemura, T. Ogawa, A. Yoshino, Y. Sato and S. Nomura
- 187 Clinical efficacy of individual cognitive behavior therapy for psychophysiological insomnia in 20 outpatients  
M. Sato, W. Yamadera, M. Matsushima, H. Itoh and K. Nakayama

## Short Communications

- 196 No association between polymorphism in tyrosine hydroxylase and personality traits in healthy Japanese subjects  
S. Tsuchimine, N. Yasui-Furukori, A. Kaneda, M. Saito, T. Nakagami, N. Sugawara and S. Kaneko
- 199 Attitudes of early-career psychiatrists in Japan toward child and adolescent psychiatry and their career decision  
M. Tateno, T. Kato, W. Nakano, A. R. Teo, A. Nakagawa, K. Miyajima, S. Kanba, J. Nakamura and T. Saito
- 202 Rapid response to antipsychotic treatment on psychotic prodrome: Implications from a case series  
C-C. Liu, Y-H. Sheu, S-Y. Wu, M-C. Lai and H-G. Hwu
- 207 Pilot study of pharmacological treatment for frontotemporal dementia: Effect of Yokukansan on behavioral symptoms  
T. Kimura, H. Hayashida, H. Furukawa and J. Takamatsu

## Letters to the Editor

- 211  
216 Erratum
